# Supplementary material
Source: HighWire-hosted journal article supplement (https://jnm.snmjournals.org/highwire/filestream/94230/field_highwire_adjunct_files/0/jnm078667_Supplemental_Table_1.pdf)
Supplement: jnm078667_Supplemental_Table_1.pdf [file jnm078667_Supplemental_Table_1.pdf]

**Supplemental Table 1.** Results of quantitative analysis and visual inspection of <sup>11</sup>C-acetate PET/CT, <sup>1</sup>H MRS and MRI data

| Patient No. | SUV max <sup>†</sup> |                 | SUV 60% <sup>‡</sup> |     | CCP/C max <sup>§</sup> |      | CCP/C avg <sup>  </sup> |      | Agreement with biopsy |          |
|-------------|----------------------|-----------------|----------------------|-----|------------------------|------|-------------------------|------|-----------------------|----------|
|             | D <sup>¶</sup>       | ND <sup>#</sup> | D                    | ND  | D                      | ND   | D                       | ND   | PET                   | MRI      |
| 1           | 4                    | 4.9             | 2.7                  | 3.5 | 1.16                   | 1.14 | 0.97                    | 0.69 | no                    | no       |
| 2           | 4.2                  | 3.4             | 3                    | 2.5 | N/A                    | N/A  | N/A                     | N/A  | yes                   | yes      |
| 3           | 5.1                  | 5.1             | 3.4                  | 3.4 | 1.97                   | 1.97 | 1.15                    | 1.15 | no                    | no       |
| 4           | 7.2                  | 4.6             | 5.7                  | 3.4 | 1.73                   | 1.1  | 1.21                    | 0.85 | yes                   | yes      |
| 5           | 3.7                  | 3.8             | 2.7                  | 2.3 | 1.54                   | 0.73 | 1.01                    | 0.38 | yes                   | yes      |
| 6           | 4.6                  | 3.5             | 3.2                  | 2.5 | 1.97                   | 1.97 | 1.11                    | 1.37 | yes                   | yes      |
| 7           | 5.8                  | 4.8             | 4                    | 3.3 | 0.6                    | 1.08 | 0.44                    | 0.52 | yes                   | yes      |
| 8           | 6.5                  | 5.4             | 4.5                  | 3.7 | 2.36                   | 1.61 | 0.69                    | 0.63 | yes                   | no       |
| 9           | 4.2                  | 5               | 2.8                  | 3.4 | 1.23                   | 1.02 | 0.62                    | 0.78 | no                    | no       |
| 10          | 6.6                  | 6.6             | 4.7                  | 4.7 | 1.44                   | 1.08 | 0.67                    | 0.76 | yes                   | yes      |
| 11          | 6.9                  | 3.7             | 5.2                  | 2.6 | 1.38                   | 1.33 | 0.74                    | 0.53 | yes                   | yes      |
| 12          | 5.3                  | 5.5             | 3.7                  | 3.7 | 2.41                   | 0.98 | 0.82                    | 0.62 | yes                   | yes      |
| 13          | 4.1                  | 4.8             | 2.8                  | 3.2 | 0.68                   | 1.29 | 0.4                     | 0.58 | no                    | yes      |
| 14          | 3.6                  | 3.6             | 2.6                  | 2.6 | 1.62                   | 1.62 | 1.04                    | 1.04 | yes                   | no       |
| 15          | 5.9                  | 6.4             | 4.2                  | 4.4 | 1.04                   | 0.82 | 0.62                    | 0.82 | no                    | yes      |
| 16          | 12.2                 | 3.5             | 8.6                  | 2.5 | 1.47                   | 1.44 | 0.91                    | 0.91 | yes                   | yes      |
| 17          | 3.7                  | 5               | 3.7                  | 3.3 | 1.23                   | 1.77 | 0.6                     | 0.93 | yes                   | yes      |
| 18          | 4.7                  | 4.5             | 3.2                  | 3   | N/A*                   | N/A  | N/A                     | N/A  | yes                   | no       |
| 19          | 7.3                  | 6               | 5.2                  | 4.3 | 1.57                   | 1.08 | 0.65                    | 0.52 | yes                   | yes      |
| 20          | 4.7                  | 4.7             | 3.3                  | 3.3 | 1.29                   | 0.7  | 1.16                    | 0.7  | yes                   | yes      |
| 21          | 6                    | 7.4             | 4.1                  | 5.2 | N/A                    | N/A  | N/A                     | N/A  | no                    | yes      |
| Mean        | 5.5                  | 4.9             | 4.0                  | 3.4 | 1.48                   | 1.26 | 0.82                    | 0.77 | yes = 15              | yes = 15 |
| SD          | 1.9                  | 1.1             | 1.4                  | 0.8 | 0.49                   | 0.39 | 0.25                    | 0.24 | no = 6                | no = 6   |

\*N/A, not available; SUV max<sup>†</sup>, maximal standardized uptake value; SUV 60%<sup>‡</sup>- average standardized uptake values with a 60% threshold; CCP/C max<sup>§</sup>, maximal (choline+creatine+polyamines)/citrate ratio; CCP/C avg<sup>||</sup>, average (choline+creatine+polyamines)/citrate ratio; D<sup>¶</sup>, dominant lobe based on biopsy findings; ND<sup>#</sup>, nondominant lobe based on biopsy findings
